# Supplementary material
Source: PubMed Central journal article supplement (PMC9104469)
Supplement: NIHMS1804021-supplement-Supplement.pdf [file NIHMS1804021-supplement-Supplement.pdf]

Supplemental Figure 1. CONSORT 2010 Flow Diagram

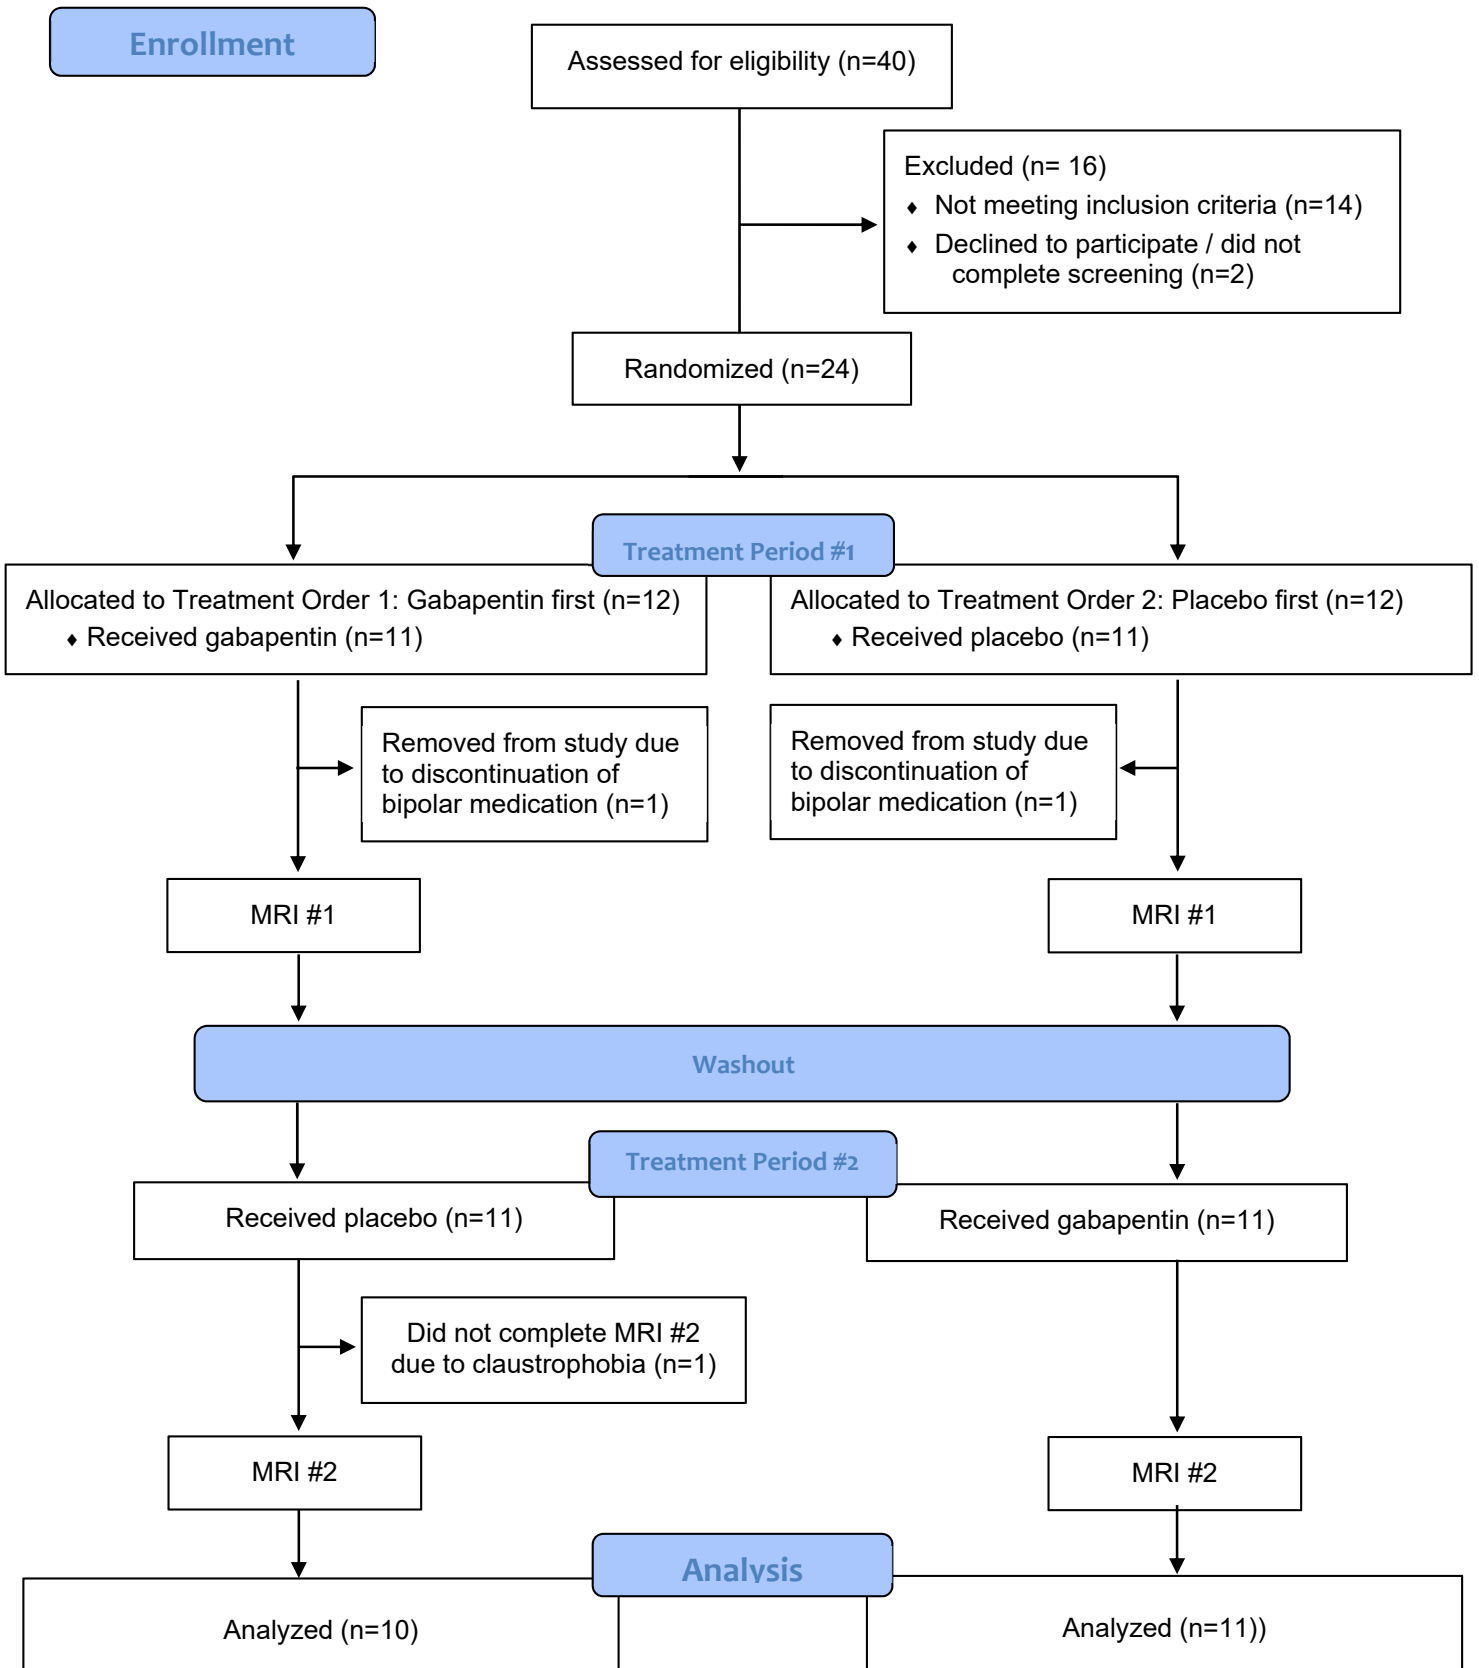

**BASELINE EVALUATION: VISIT 1 (V1)**

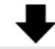

**CONDITION A: Gabapentin\***

| Condition Day | Day 1               |     | Day 2 |     | Day 3 |     | Day 4 |     | Day 5         |     | Day 6   |         | Day 7   |         |         |
|---------------|---------------------|-----|-------|-----|-------|-----|-------|-----|---------------|-----|---------|---------|---------|---------|---------|
| AM            | PM                  | AM  | PM    | AM  | PM    | AM  | PM    | AM  | PM            | AM  | PM      | AM      | PM      | AM      | PM      |
| Dose (in mg)  | 300                 | 300 | 300   | 600 | 600   | 600 | 600   | 600 | 600           | 600 | Washout | Washout | Washout | Washout | Washout |
| Study Visit   | <b>V2: Med Disp</b> |     |       |     |       |     |       |     | <b>V3:MRI</b> |     |         |         |         |         |         |

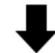

**CONDITION B: Placebo\***

| Condition Day | Day 1               |     | Day 2 |     | Day 3 |     | Day 4 |     | Day 5         |     | Day 6   |         | Day 7   |         |         |
|---------------|---------------------|-----|-------|-----|-------|-----|-------|-----|---------------|-----|---------|---------|---------|---------|---------|
| AM            | PM                  | AM  | PM    | AM  | PM    | AM  | PM    | AM  | PM            | AM  | PM      | AM      | PM      | AM      | PM      |
| Dose (in mg)  | N/A                 | N/A | N/A   | N/A | N/A   | N/A | N/A   | N/A | N/A           | N/A | Washout | Washout | Washout | Washout | Washout |
| Study Visit   | <b>V4: Med Disp</b> |     |       |     |       |     |       |     | <b>V5:MRI</b> |     |         |         |         |         |         |

*Supplemental Figure 2.* Study design schematic. \*Condition order was randomized between participants. Med Disp = Medication Dispensing.

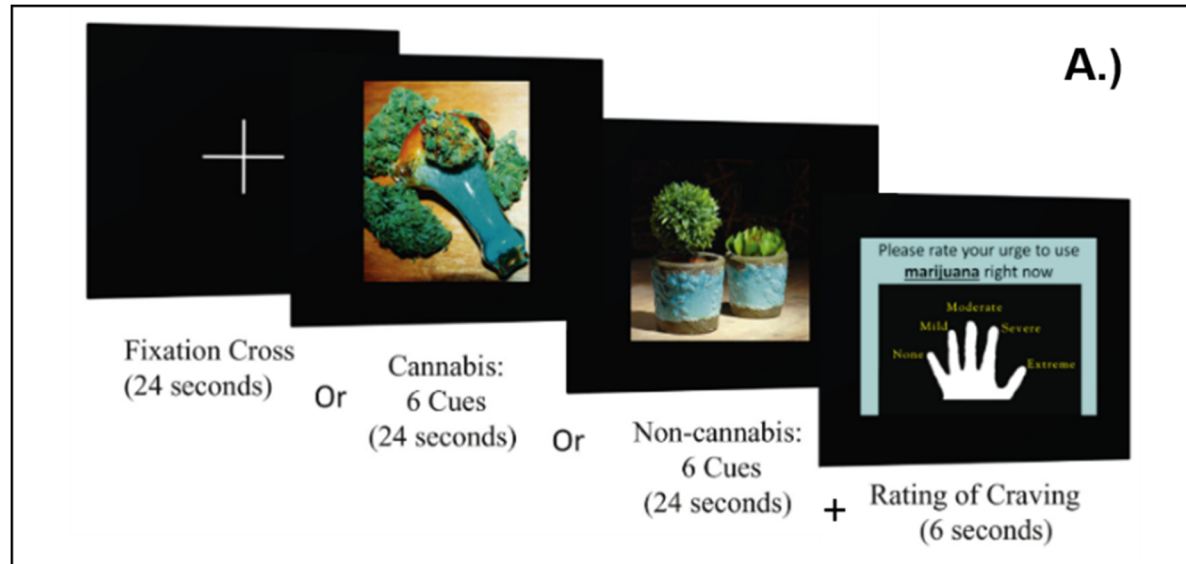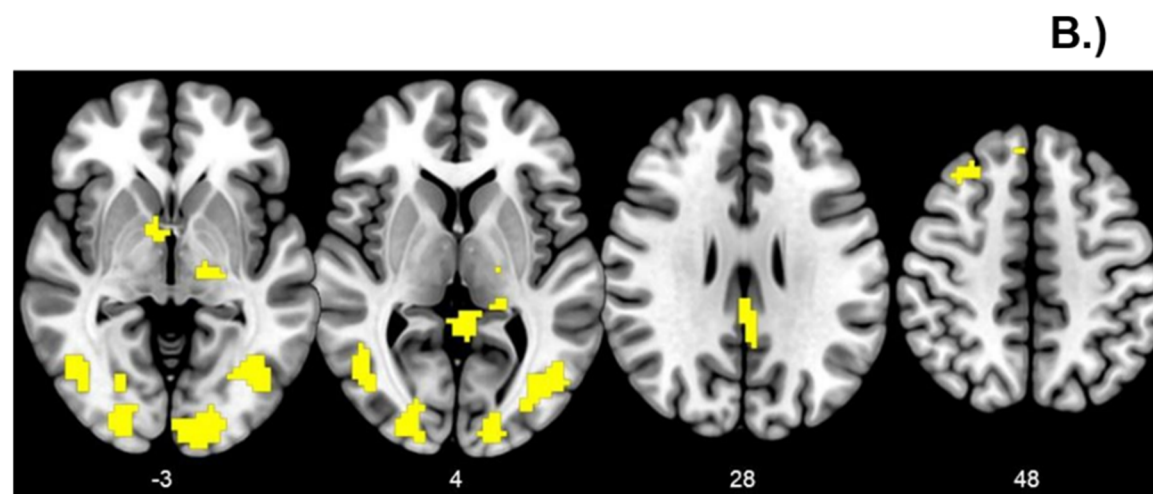

**Supplemental Figure 3.** A.) Cannabis Cue Reactivity fMRI task schematic. Each task epoch included a fixation cross block, cannabis cue image block, and neutral image block; after each block, participants rate their “urge to use marijuana.” Adapted from *Karoly, 2019*. B) Cannabis cue minus neutral-image activation (yellow) in BD+CUD participants while on placebo, after controlling for condition order ( $z > 2.58$ , FWE-corrected  $p < 0.05$ ). Activated regions included, R pallidum, bilateral thalamus and L posterior cingulate ( $k = 995$ ,  $p_{FWE} = 0.001$ ; peak:  $x = 9$ ,  $y = 2$ ,  $z = -4$ ), R superior and middle frontal gyrus ( $k = 657$ ,  $p_{FWE} = 0.010$ ; peak coordinate:  $x = 33$ ,  $y = 29$ ,  $z = 47$ ), and L occipital cortex ( $k = 2389$ ,  $p_{FWE} < 0.001$ ; peak:  $x = -36$ ,  $y = -70$ ,  $z = 5$ ).

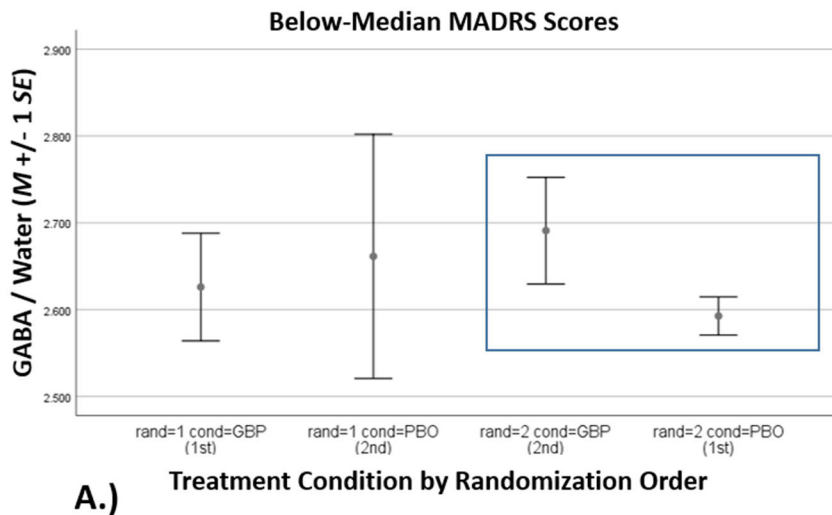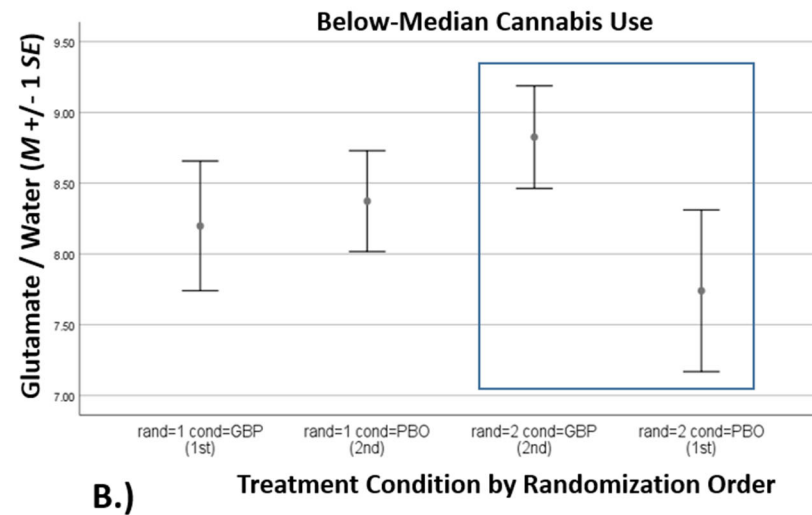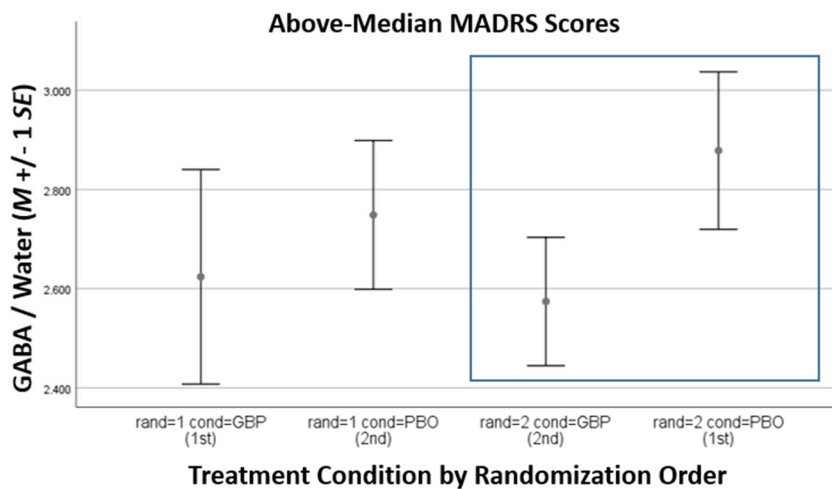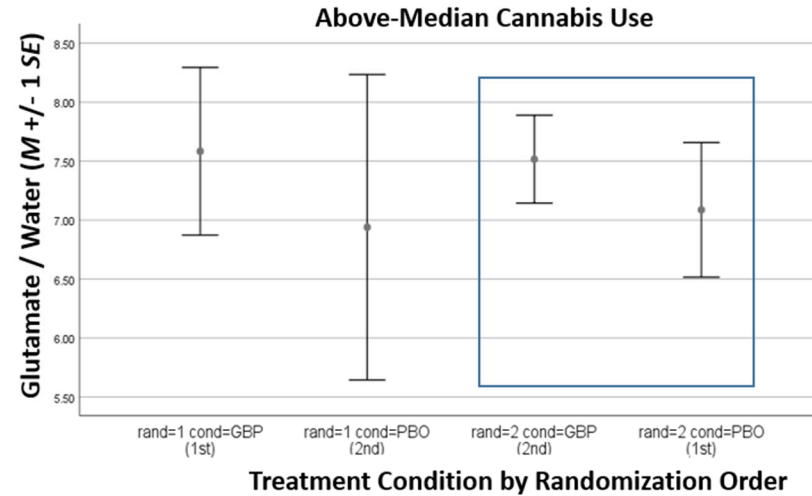

*Supplemental Figure 4.* A.) dACC GABA levels by treatment condition (GBP = gabapentin, PBO = placebo) and randomization order (rand) by depressive symptom (MADRS) scores during the study (top = below-median MADRS scores, bottom = above-median MADRS scores). B.) rBG glutamate levels by treatment condition (GBP = gabapentin, PBO = placebo) and randomization order (rand) by cannabis use during the study (top = below-median cannabis use, bottom = above-median cannabis use).

| <b>Body System<br/>Adverse Event</b> | <b>Placebo<br/>(% reporting, N=22)</b> | <b>Gabapentin<br/>(% reporting, N=22)</b> | <b>P-value*</b> |
|--------------------------------------|----------------------------------------|-------------------------------------------|-----------------|
| <b>Gastrointestinal</b>              |                                        |                                           |                 |
| Abdominal cramps                     | 1 (4.5)                                | 0                                         | 1.00            |
| Diarrhea                             | 0                                      | 1 (4.5)                                   | 1.00            |
| Nausea                               | 2 (9.1)                                | 0                                         | 1.00            |
| Vomiting                             | 1 (4.5)                                | 0                                         | 1.00            |
| Increased appetite                   | 1 (4.5)                                | 0                                         | 1.00            |
| <b>Neurological</b>                  |                                        |                                           |                 |
| Fatigue                              | 2 (9.1)                                | 2 (9.1)                                   | 1.00            |
| Somnolence                           | 0                                      | 1 (4.5)                                   | 1.00            |
| Dizziness                            | 1 (4.5)                                | 1 (4.5)                                   | 1.00            |
| Headache                             | 2 (9.1)                                | 0                                         | 0.50            |
| Blepharospasm                        | 0                                      | 1 (4.5)                                   | 1.00            |
| <b>Psychiatric</b>                   |                                        |                                           |                 |
| Insomnia                             | 1 (4.5)                                | 0                                         | 1.00            |
| Memory impairment                    | 0                                      | 1 (4.5)                                   | 1.00            |
|                                      | 11                                     | 7                                         |                 |
| All reported AEs                     | 0                                      | 0                                         |                 |
| Serious AEs                          |                                        |                                           |                 |

*Supplemental Table 1. Adverse Events. Summary of all adverse events reported per treatment condition. \*P-value comparing treatment condition using McNemar's test.*
